# Supplementary material
Source: MDPI journal article supplement (https://www.mdpi.com/2673-8430/3/2/23)
Supplement: s1 [file s1]

Table S1: Statistical parameters for the fit in Figure 1 (top) and Figure 2 (lower), calculated using the LINEST function in Microsoft Excel.

| Excess mortality percentage as a function of stringency index                      |          |          |              |               |       |          |
|------------------------------------------------------------------------------------|----------|----------|--------------|---------------|-------|----------|
| $m_1$                                                                              | 0.125651 | 6.642761 | $m_0$        | $y=m_0+m_1*x$ |       |          |
| $se_1$                                                                             | 0.090745 | 3.802681 | $se_0$       |               |       |          |
| $r^2$                                                                              | 0.066302 | 4.84616  | $se_y$       |               |       |          |
| F                                                                                  | 1.917288 | 27       | df           | $v_1$         | $v_2$ | p-value  |
| $ss_{reg}$                                                                         | 45.02802 | 634.1023 | $ss_{resid}$ | 1             | 27    | 0.177493 |
|                                                                                    |          |          |              |               |       |          |
| Excess mortality percentage as a function of total vaccinations per hundred people |          |          |              |               |       |          |
| $m_1$                                                                              | 0.063214 | 4.382551 | $m_0$        | $y=m_0+m_1*x$ |       |          |
| $se_1$                                                                             | 0.030088 | 3.615418 | $se_0$       |               |       |          |
| $r^2$                                                                              | 0.140512 | 4.64959  | $se_y$       |               |       |          |
| F                                                                                  | 4.414036 | 27       | df           | $v_1$         | $v_2$ | p-value  |
| $ss_{reg}$                                                                         | 95.42568 | 583.7047 | $ss_{resid}$ | 1             | 27    | 0.045117 |
